# Supplementary material
Source: Research Square preprint supplement (doi:10.21203/rs.3.rs-8865046/v1)
Supplement: Supplementary file 1 [file 2eeee417635426e6a00c1848.docx]

Supplementary

| Table S1. Distribution of H**ealthcare Providers** Responses to Stigma-related Statements, Sana’a City, Yemen, ( 499) | | | |
| --- | --- | --- | --- |
| Item | Agree n(%) | Neutral n (%) | Disagree (%) |
| **Blame of infection** |  |  |  |
| Responsible for getting HIV | 168 (33.6%) | 32 (6.4%) | 299 (59.9%) |
| Punished by God | 97 (19.4%) | 62 (12.4%) | 340 (68.1%) |
| Multiple partners deserve HIV | 352 (70.6%) | 56 (11.2%) | 91 (18.2%) |
| HIV+ women should not have children | 270 (54.1%) | 75 (15.0%) | 154 (30.9%) |
| More sympathetic to blood transmission | 401 (80.4%) | 31 (6.2%) | 67 (13.4%) |
| Children infected from mother deserve treatment | 324 (64.9%) | 31 (6.2%) | 144 (28.9%) |
| People infected by blood deserve treatment | 293 (58.7%) | 34 (6.8%) | 172 (34.5%) |
| Sympathetic to people infected sexually | 175 (35.1%) | 62 (12.4%) | 262 (52.5%) |
| HIV+ are promiscuous and deserve it | 168 (33.6%) | 96 (19.2%) | 235 (47.1%) |
| Woman HIV+ has only herself to blame | 119 (23.8%) | 84 (16.8%) | 296 (59.3%) |
| **Fear of infection** |  |  |  |
| Worry putting friends/family at risk | 279 (55.9%) | 56 (11.2%) | 164 (32.9%) |
| Fear from social contact (handshake, hug, food) | 212 (42.5%) | 60 (12.0%) | 227 (45.5%) |
| People will stigmatize you for care | 176 (35.3%) | 121 (24.2%) | 202 (40.5%) |
| Worry about child if teacher has AIDS | 235 (47.1%) | 65 (13.0%) | 199 (39.9%) |
| Worry getting HIV from patients | 398 (79.8%) | 40 (8.0%) | 61 (12.2%) |
| **Desire for separation** |  |  |  |
| Patients with HIV should be isolated | 320 (64.2%) | 36 (7.2%) | 123 (24.6%) |
| Children removed if parent HIV+ | 133 (26.6%) | 72 (14.4%) | 294 (58.9%) |
| Friend with AIDS: would not maintain friendship | 50 (10.0%) | 95 (19.0%) | 354 (70.9%) |
| PLHIV should be isolated from society | 114 (22.8%) | 59 (11.8%) | 326 (65.2%) |
| Would not hire known HIV+ | 241 (48.3%) | 122 (24.4%) | 136 (27.3%) |
| Would not work with known HIV+ colleague | 98 (19.6%) | 115 (23.0%) | 286 (57.3%) |
| **Inequality of Care** |  |  |  |
| PLHIV have right to same quality of care | 447 (89.6%) | 26 (5.2%) | 26 (5.2%) |
| Important to work with patients in caring manner | 401 (80.4%) | 50 (10.0%) | 48 (9.6%) |
| PLHIV should be treated with same respect | 431 (86.4%) | 41 (8.2%) | 27 (5.4%) |
| Sympathetic to misery of PLHIV | 437 (87.6%) | 37 (7.4%) | 25 (5.0%) |
| Would like to make life easier for PLHIV | 434 (87.0%) | 36 (7.2%) | 29 (5.8%) |
| Would do best care for PLHIV | 426 (85.4%) | 39 (7.8%) | 34 (6.8%) |
| HIV: human immunodeficiency virus, PLHIV; People livening with HIV, AIDS; Acquired immunodeficiency Syndrome, n; Number | | | |

.

| **Table S 2.** Distribution of H**ealthcare Providers** Responses to Discriminatory-related Statements**, Sana’a City, Yemen (n-499)** | | | | |
| --- | --- | --- | --- | --- |
| Practices | Some times to always | | Rarely or never | |
| No. | % | No. | % |
| **Passive denial of services** |  |  |  |  |
| Providers delay treatment or provide slower service for PLHIV | 342 | 69% | 157 | 31% |
| Providers postpone treatment /surgery as long as possible | 372 | 75% | 127 | 25% |
| **Substandard treatment** |  |  |  |  |
| Providers administer medication but don’t touch or physically examine patients with HIV/AIDS | 365 | 73% | 134 | 27% |
| Providers try to cleverly deny admission of HIV positive patients but admission is not denied outright | 376 | 75% | 123 | 25% |
| Providers prescribe non-serious medicines (vitamins) to HIV/AIDs patients with opportunistic infections | 249 | 50% | 250 | 50% |
| Providers keep PLHIV under observation without a treatment plan | 288 | 58% | 211 | 42% |
| **Selective use of Universal precautions:** |  |  |  |  |
| Providers use protective wear (e.g. gloves, gowns, mask, etc) to do noninvasive physical exams on non-bleeding PLHIV even if patients do not have open sores | 407 | 82% | 92 | 18% |
| Providers use double gloves when preparing the body of a deceased PLHIV | 422 | 85% | 77 | 15% |
| **Confidentiality of HIV patients** |  |  |  |  |
| Providers do not maintain the confidentiality of PLHIV | 346 | 69% | 153 | 31% |
| HIV: human immunodeficiency virus, PLHIV; People livening with HIV, AIDS; Acquired immunodeficiency Syndrome, No.; Number | | | | |
