# Supplementary material
Source: Research Square preprint supplement (doi:10.21203/rs.3.rs-8865046/v1)
Supplement: Supplementary file 2 [file 6790d9ff1e5256a4875b64ff.docx]

**English Version of the Study Questionnaire**

**Facility Information:**    **Serial Number:** ......................

**Name of the hospital:** ....................................

1. Put a check mark (✓) next to the department where you work:
   [ ] Emergency  [ ] Surgery  [ ] Inpatient (Ward)  [ ] Obstetrics & Gynecology  [ ] Internal Medicine [ ] Pediatrics  [ ] Other (please specify): .............................

**Section One: Personal Information**

Answer all the following questions by placing a check mark (✓) in front of the answer that applies to you.

| **No.** | **Question** | **Answer** | **Go to** |
| --- | --- | --- | --- |
| 1 | Gender? | [ ] Male  [ ] Female |  |
| 2 | Age? | [  ] Month  [  ] Year |  |
| 3 | Marital status? | [  ] Single [] Married [  ] Other |  |
| 4 | Profession? | [ ] Doctor [ ] Physician Assistant  [ ]Nurse [ ] Midwife [ ] Other (please specify): ...................... |  |
| 5 | Specialty? | [ ] General Medicine  [ ] Surgery  [ ] Obstetrics & Gynecology [ ] Pediatrics  [ ] Anesthesia [ ] Nursing [ ] Midwifery  [ ] Other: ....... |  |
| 6 | Qualification? | ............................................................ |  |
| 7 | Since when have you been working in the health field? | [  ] Month  [  ] Year |  |
| 8 | Have you ever provided medical care to patients living with HIV? | [  ] Yes  [  ] No |  |
| 9 | Have you received any training on HIV or AIDS? | [ ] Yes  [ ] No  If the answer is No, go to | Section 2 |
| 10 | Where did you receive the training? | [ ] In the hospital  [ ] In the AIDS program [ ] In a health institute  [ ] At the university [ ] In another place (please specify): ..................... |

**Section II: attitude toward PLHIV (27 statements)**

| # | Indicate your agreement in each of the following statements: by placing a check mark (✓) | Strongly agree | Agree | Neutral | disagree | Strongly disagree |
| --- | --- | --- | --- | --- | --- | --- |
|  | **Blame for infection** |  |  |  |  |  |
| 1 | You feel more sympathetic with people who get AIDS from blood transfusion than who get it from prostitution. |  |  |  |  |  |
| 2 | People who have many sexual partners deserve getting AIDS. |  |  |  |  |  |
| 3 | Children who get AIDS from their mothers are more deserving treatment than people who get AIDS by sexual promiscuity. |  |  |  |  |  |
| 4 | People who get AIDS through blood transfusion are more deserving of treatment than people who get AIDS through sexual promiscuity. |  |  |  |  |  |
| 5 | HIV positive women should not have children. |  |  |  |  |  |
| 6 | You have a little sympathy for people who get AIDS through sexual promiscuity. |  |  |  |  |  |
| 7 | Most people with AIDS are responsible for getting HIV. |  |  |  |  |  |
| 8 | Most likely, men who are HIV positive are promiscuous and deserve what they get. |  |  |  |  |  |
| 9 | If a woman becomes HIV positive, she has only here self to blame. |  |  |  |  |  |
| 10 | People with AIDS are punished by God. |  |  |  |  |  |
|  | **Fear of infection:** |  |  |  |  |  |
| 11 | You worry about getting AIDS from your HIV patients. |  |  |  |  |  |
| 12 | If assigned to patients with AIDS, you worry putting your friends and family at risk of contracting the disease. |  |  |  |  |  |
| 13 | You would be worried about your child to get AIDS if his/her teacher had AIDS. |  |  |  |  |  |
| 14 | You worry about getting AIDS from social contact with such as sharing food, shaking hands, or hugging. |  |  |  |  |  |
| 15 | If people know you take care of HIV/AIDS patients, they will stigmatize you. |  |  |  |  |  |
|  | **Desire for separation** |  |  |  |  |  |
| 16 | Patients with HIV should be isolated from other patients. |  |  |  |  |  |
| 17 | You would work with colleagues who you know are HIV positive. |  |  |  |  |  |
| 18 | You would hair someone with HIV positive to work at the clinic. |  |  |  |  |  |
| 19 | Children should be removed from home if one of the parents is HIV positive. |  |  |  |  |  |
| 20 | People with HIV should be isolated from the rest of community. |  |  |  |  |  |
| 21 | If you found out that a friend had AIDS, you would not maintain the friendship. |  |  |  |  |  |
|  | **Sympathy and equality of care** |  |  |  |  |  |
| 22 | Patients with AIDS have the right to the same quality of care as any other patients. |  |  |  |  |  |
| 23 | You are sympathetic towards the misery that PLWA DS experience. |  |  |  |  |  |
| 24 | You would like to do something to make life easier for PLWHA. |  |  |  |  |  |
| 25 | Patients with AIDS should be treated with the same respect as any other patients. |  |  |  |  |  |
| 26 | You would do everything you could to give the best care to PLWHA. |  |  |  |  |  |
| 27 | It is important to work with patients with AIDS in a caring manner. |  |  |  |  |  |

**Section 3: Discriminatory practice statements**

| # | Based on your experience, how often do healthcare providers most likely engage in the following practices by placing a check mark (✓) | Always | often | sometimes | rearly | Never |
| --- | --- | --- | --- | --- | --- | --- |
| 1 | Providers delay treatment or provide slower service for HIV positive patients |  |  |  |  |  |
| 2 | Providers postpone treatment /surgery for HIV patients as long as possible |  |  |  |  |  |
| 3 | Providers administer medication but don’t touch or physically examine patients with HIV/AIDS |  |  |  |  |  |
| 4 | Providers try to cleverly deny admission of HIV positive patients but admission is not denied outright |  |  |  |  |  |
| 5 | Providers prescribe ‘non-serious’ medicines (e.g. vitamins) to HIV/AIDs patients with opportunistic infections instead of real medicines |  |  |  |  |  |
| 6 | Providers keep HIV positive patients under observation without a treatment plan |  |  |  |  |  |
| 7 | Providers use protective wear (e.g. gloves, gowns, mask, etc) to do noninvasive physical exams on non-bleeding HIV positive patients even if patients does not have open sores |  |  |  |  |  |
| 8 | Providers use double gloves when preparing the body of a deceased HIV patient |  |  |  |  |  |
| 9 | Providers do not maintain the confidentiality of HIV positive patients |  |  |  |  |  |
